# Supplementary material for: Palladium(ii)-based cis,trans-1,3,5-triaminocyclohexane complexes demonstrating a variety of coordination modes and architectures
Source: Royal Society of Chemistry journal article supplement (doi:10.1039/b307616d), 2003-01-01
Supplement: b307616d.doc [file b307616d.doc]

**Palladium(II)-Based *cis,trans*-1,3,5-Triaminocyclohexane Complexes Demonstrating a Variety of Coordination Modes and Architectures**

Georg Seeber,a De-Liang Long,a Benson M. Kariukib and Leroy Cronin*a

*a Department of Chemistry, The University of Glasgow, University Avenue, Glasgow, G12 8QQ, UK. Fax +44 141 330 4888; Tel: +44 141 330 6650; E-mail: L.Cronin@chem.gla.ac.uk*

*b School of Chemical Sciences, The University of Birmingham, Edgbaston, Birmingham, B15 2TT, UK*

The flexibility of **L** is demonstrated by the variation of the interplanar angle Θ (Supplementary Fig., blue) between the Pd(II) coordination mean plane (Plane A) and the mean plane of the two *axial* nitrogens and their corresponding methine carbons (Plane B). The smaller the angle Θ becomes, the more regular the metallacyclic chair conformation is and the more the Pd(II) is orientated towards the cyclohexane centre, resulting in an overall compressed structure. Additional flexibility of *trans*-tach is given upon coordination of the ‘Tail’ amino group, which is expressed by the torsion around the C-N bond of the pendant amino group (Supplementary Fig., red; χ is the torsion angle between the centre of the cyclohexane ring, carbon C, nitrogen Neq and Pd(II)).


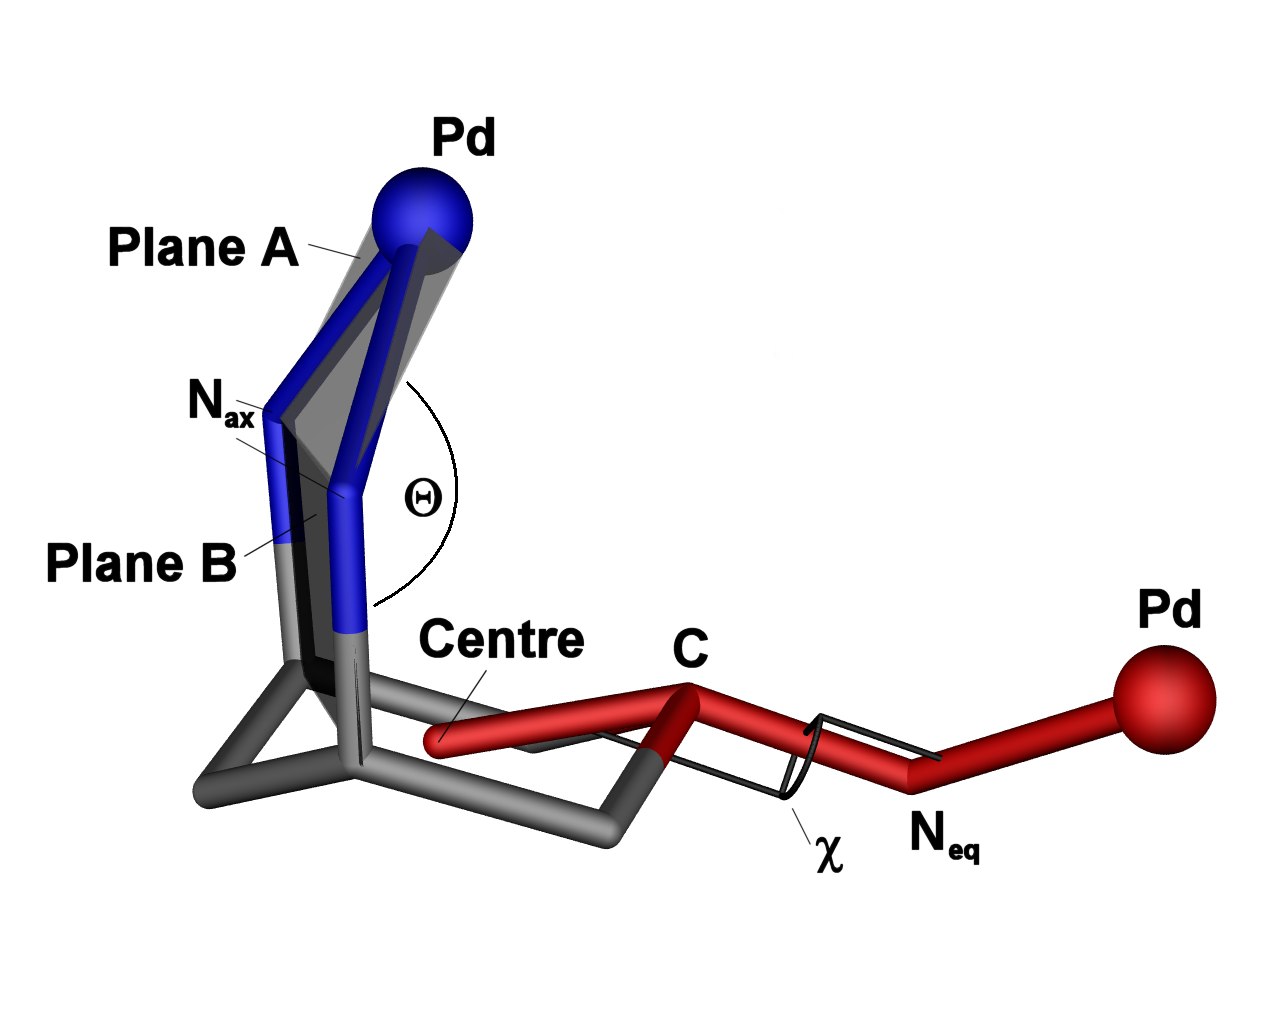


**Fig. S1** Interplanar angle Θ (blue) between planes A and B. A is the mean plane of the chelated Pd(II) coordination sphere; plane B is the mean plane of the two nitrogen atoms Nax and the corresponding methine carbon atoms. Torsion angle χ (red) lies between the centre of the cyclohexane ring, carbon C, nitrogen Neq and Pd(II).

**Table S1** Interplanar angle Θ and torsion angle χ for complexes **1**-**7**.

| [Pd(**L**H)Cl2]Cl  **1** | [Pd(**L**H)Br2]2[PdBr4] **2** | [Pd(**L**H)2](NO3)4  **3** | [Pd(**L**H)2](SO4)2  **4** | [{Pd(**L**)Cl}6]Cl6  **5** | [{Pd(**L**)Br}6]Br6  **6** | [Pd{Pd(**L**)Cl2}2Cl2]  **7** |
| --- | --- | --- | --- | --- | --- | --- |
| Θ 146.0° | Θ 170.8° | Θ 142.8° | Θ 165.2° | i  Θ1 159.7,  χ1 112.1  Θ2 148.5,  χ2 123.5  Θ3 147.2,  χ3 116.6 | i  Θ1 148.0,  χ1 114.7  Θ2 148.9,   χ2 122.4  Θ3 149.6,  χ3 127.6 | Θ 150.3°,  χ 133.6° |

iIndices1,2,3 correspond to Ring units 1, 2, 3.
